# Supplementary material for: Theoretical prediction of negative thermal expansion in cubic VF3
Source: Royal Society of Chemistry journal article supplement (doi:10.1039/d4nj00577e), 2024-01-01
Supplement: d4nj00577e1.pdf [file d4nj00577e1.pdf]

### Supporting Information

Theoretical Prediction of Negative Thermal Expansion in Cubic VF<sub>3</sub>

Dingfeng Yang<sup>a,b\*</sup>, Yurou Tang<sup>a</sup>, Junzhu Yang<sup>a</sup>, Hongzheng Pu<sup>a</sup>, Mingyu Pi<sup>c,d,\*</sup>, Yuanyuan  
Li<sup>e\*</sup>

<sup>a</sup>College of Chemistry and Chemical Engineering, Chongqing University of Technology, 69  
Hongguang Rd, Lijiatuo, Banan District, Chongqing 400054, People's Republic of China.

<sup>b</sup>Chongqing Precision Medicine Industrial Technology Research Institute, Chongqing 400799,  
People's Republic of China.

<sup>c</sup>College of Engineering and Applied Sciences, Nanjing University, Nanjing 210093,  
People's Republic of China.

<sup>d</sup>College of Physics and Electronic Engineering, Chongqing Normal University, Chongqing  
401331, People's Republic of China.

<sup>e</sup>Department of Biological and Chemical Engineering, Chongqing University of Education,  
Chongqing 400067, People's Republic of China.

\*Corresponding author.

Dingfeng Yang<sup>a,b\*</sup>, Chongqing 400054, People's Republic of China.

Email address: yangxunscience@cqut.edu.cn

Mingyu Pi<sup>c,d,\*</sup>, Chongqing 401331, People's Republic of China.

Email address: mingyupi@cqnu.edu.cn

Yuanyuan Li<sup>e\*</sup>, Chongqing 400067, People's Republic of China.

Email address: liyy@cque.edu.cn

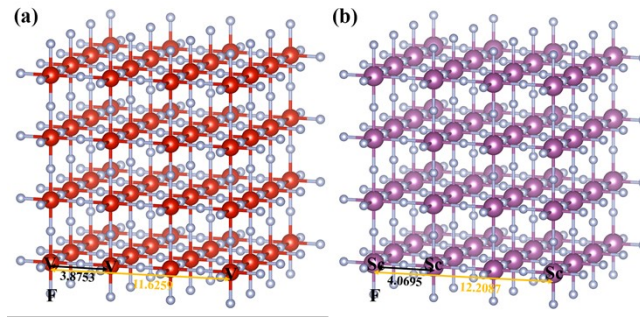

Figure S1. The  $3\times 3\times 3$  supercell structure of (a)  $\text{VF}_3$  and (b)  $\text{ScF}_3$

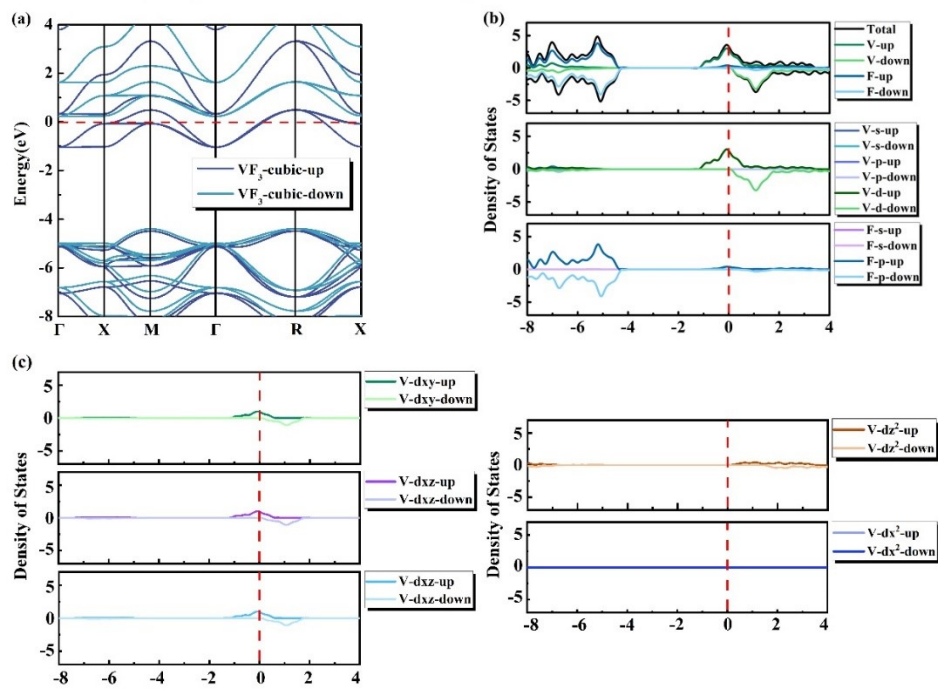

Figure S2. (a) Calculated band structure (b) density of states of cubic  $\text{VF}_3$ .

(c) d-orbitals of V atom. Red dashed line indicates Fermi level.

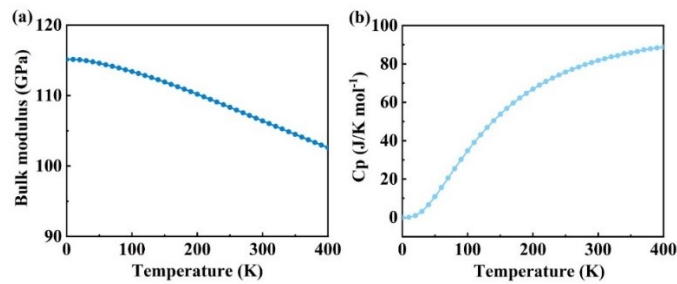

Figure S3. Calculated thermodynamic properties of  $\text{VF}_3$  versus temperature: (a) bulk modulus ( $B$ );

(b) heat capacities ( $C_p$ ).

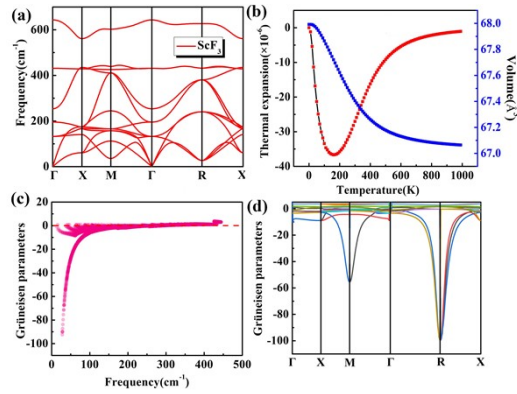

Figure S4. (a) Phonon dispersion (b) NTE and unit volume versus temperature (c) Phonon mode Grüneisen parameter (d) Grüneisen parameter along high symmetry direction of cubic ScF<sub>3</sub>

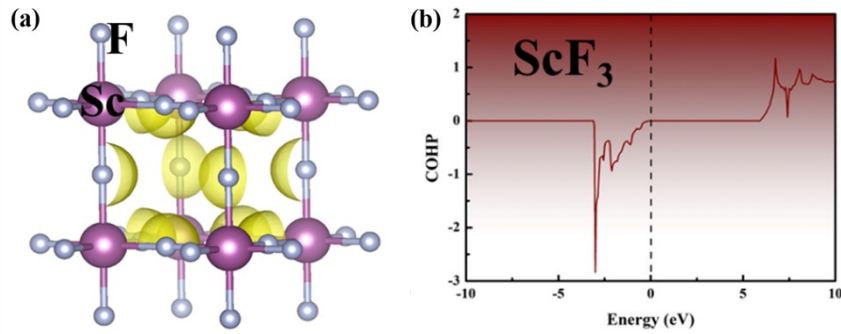

Figure S5. (a) Electron localization function (ELF) (isosurface value: 0.6 bohr<sup>-3</sup>) of ScF<sub>3</sub>, Red, brown atoms denote V and F atoms, respectively. (b) The calculated COHP of ScF<sub>3</sub>.

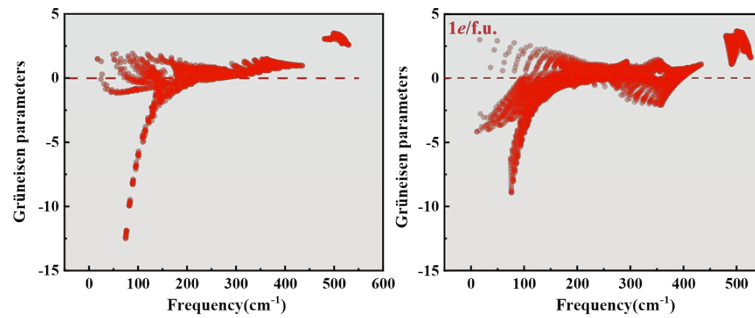

Figure S6. Calculated mode Grüneisen parameters of cubic supercell V<sub>27</sub>F<sub>81</sub> with 0 e and 1 e, respectively. (1e/f.u.: adding one electron into the supercell V<sub>27</sub>F<sub>81</sub>)

Table S1. Elastic properties of cubic VF<sub>3</sub>.

|                 | $C_{11}$ (GPa) | $C_{12}$ (GPa) | $C_{44}$ (GPa) | $B$ (GPa) | $G$ (GPa) | $E$ (GPa) |
|-----------------|----------------|----------------|----------------|-----------|-----------|-----------|
| VF <sub>3</sub> | 299.26         | 35.29          | 25.73          | 123.28    | 53.09     | 139.27    |

Table S2 Calculated Grüneisen parameters( $\gamma_i$ ) of cubic VF<sub>3</sub> at the M (0.5, 0.5, 0) and R (0.5, 0.5, 0.5) points, and compared with isostructural ScF<sub>3</sub> and ReO<sub>3</sub>.

| Compounds        | M (0.5, 0.5, 0)               | $\gamma_i$ | R (0.5, 0.5, 0.5)             | $\gamma_i$ | Maximum NTE<br>( $\times 10^{-6}$ K <sup>-1</sup> ) | References        |
|------------------|-------------------------------|------------|-------------------------------|------------|-----------------------------------------------------|-------------------|
|                  | Frequency (cm <sup>-1</sup> ) |            | Frequency (cm <sup>-1</sup> ) |            |                                                     |                   |
| VF <sub>3</sub>  | 72.48                         | -12.53     | 74.47                         | -11.82     | -6.41 (80 K)                                        | This work         |
| ScF <sub>3</sub> | 34.85                         | -57.72     | 34.65                         | -98.81     | -32.72(160 K)                                       | This work         |
|                  | 34.92                         | -80.46     | 33.72                         | -85.50     | -24.54 (90 K)                                       | Comp.Mater.Sci.   |
| ReO <sub>3</sub> | 73.99                         | -16.39     | 88.19                         | -13.39     | -1.55 (80 K)                                        | 2015,107,157-162. |
